# Supplementary material
Source: PubMed Central journal article supplement (PMC3234823)
Supplement: supp_M111.290122_jbc.M111.290122-1.pdf [file supp_M111.290122_jbc.M111.290122-1.pdf]

## **Supplemental Data**

Structure function analysis of an ADP-ribosyltransferase Type III Effector and its RNA-Binding Target in Plant Immunity

Byeong-ryool Jeong, Yan Lin, Anna Joe, Ming Guo, Christin Korneli, Huirong Yang, Ping Wang, Min Yu, Ronald L. Cerny, Dorothee Staiger, James R. Alfano, and Yanhui Xu

**Table S1. Refinement statistics of HopU1 structure<sup>a</sup>**

---

| Structure refinement statistics                    |             |
|----------------------------------------------------|-------------|
| Resolution range (Å)                               | 50.0-2.70   |
| $R_{\text{work}}/R_{\text{free}}$ (%) <sup>b</sup> | 17.87/21.18 |
| R.M.S. Deviation from ideality                     |             |
| Bonds, (Å)                                         | 0.010       |
| Angles, (°)                                        | 1.319       |
| Average B factor, (Å <sup>2</sup> )                | 27.49       |
| Ramachandran plot statistics                       |             |
| Most favored regions (%)                           | 89.7        |
| Allowed regions (%)                                | 8.9         |
| Generously allowed regions (%)                     | 1.4         |

---

<sup>a</sup> the Crystallization and preliminary crystallographic analysis has been published in Lin *et al.* (2010. Acta Crystallogr Sect F Struct Biol Cryst Commun 66: 932-934).

<sup>b</sup>  $R_{\text{free}} = \frac{\sum_{\text{Test}} ||F_{\text{obs}}| - |F_{\text{calc}}||}{\sum_{\text{Test}} |F_{\text{obs}}|}$ , where “Test” is a test set of about 5% of the total reflections randomly chosen and set aside prior to refinement for the complex.

**Figure S1. Structure comparison of HopU1 and selected ADP-ribosyltransferases.** (A) Structure of the HopU1 ADP-RT is shown as ribbon representation and colored in purple blue and L1 and L4 loops are colored yellow (B-D) Structures of the rat Ecto-ADP-RT ART2.2 (1GXZ.PDB), the *Clostridium botulinum* C3bot2 ADP-RT (1R45.PDB), and the *L. Clostridium limosum* C3 exoenzyme ADP-RT (3BW8.PDB) are shown as ribbon representation and colored in green, purple, and red, respectively. (E) Superimposition of the four ADP-RT structures. (F) PN loop and ARTT loop are indicated in compared structures. (E-F) The structures are colored as in Fig. S1A-D.

**Figure S2.** (A) Structures of HopU1 separately indicating the location of mutations M5-M9 and then summarized in central square. The altered residues are highlighted and shown as stick representations. (B) Isothermal titration calorimetry of wild type HopU1 and HopU1 mutants M5-M9 with GRP7, which indicates the extent that HopU1 derivatives can interact with GRP7. (C) The electrospray ionization-mass spectrometry results of ADP-RT activity for wild type HopU1 and HopU1 derivatives are shown. The peak of substrates and products of each enzymatic reaction is indicated. The molecular mass of GRP7 (1-90, GPHM after 3C cleavage at N terminus) is 11,260 Dalton and GRP7 with an ADP ribose modification is 11,800 Dalton. (D) Result summary of the ADP-RT activity and substrate binding affinity for wild type HopU1 and HopU1 mutants M1-M9.

**Figure S3. MS/MS spectrum of doubly charged ion of m/z 1029.92 in the tryptic digest of GRP7.** The spectrum contains a nearly complete series of y-type ions. Additional ions supporting ADP ribosylation of this peptide observed in the MS/MS spectrum are protonated adenine (m/z 136), AMP (m/z 348) and ADP (m/z 428).

**Figure S4. Electrophoretic mobility shift assay of an RNA probe with differing amounts of GRP7-GST after treatment with HopU1 or its catalytic inactive mutant HopU1<sub>DD</sub>.** Standard ADP-ribosylation reactions were performed with varying concentrations of GRP7-GST in the presence of HopU1 or HopU1<sub>DD</sub>, and a <sup>32</sup>P-labeled probe (ATGRP7 UTR WT) was added to each reaction mix. These were run on native polyacrylamide gels, and exposed to X-ray films.

**Figure S5. Expression of GRP7 in different transgenic *A. thaliana* lines.** Immunoblot using anti-HA antibodies showing the expression of GRP7-HA and GRP7<sub>R49K</sub>-HA in *A. thaliana* Col-0 and the Col-0 *grp7-1* mutant.

**Figure S6. Superimposed HopU1 and AvrPphF structures.** Two views (A, B) of the HopU1 structure (blue) superimposed with the AvrPphF structure (light green). The root mean square deviation (RMSD) of 2.9 angstrom for 64 C $\alpha$  atoms indicating that the structures did not superimpose well. The N-termini of both proteins are quite different. The C-terminal catalytic domains of both proteins share a similar fold found in ADP-RTs.

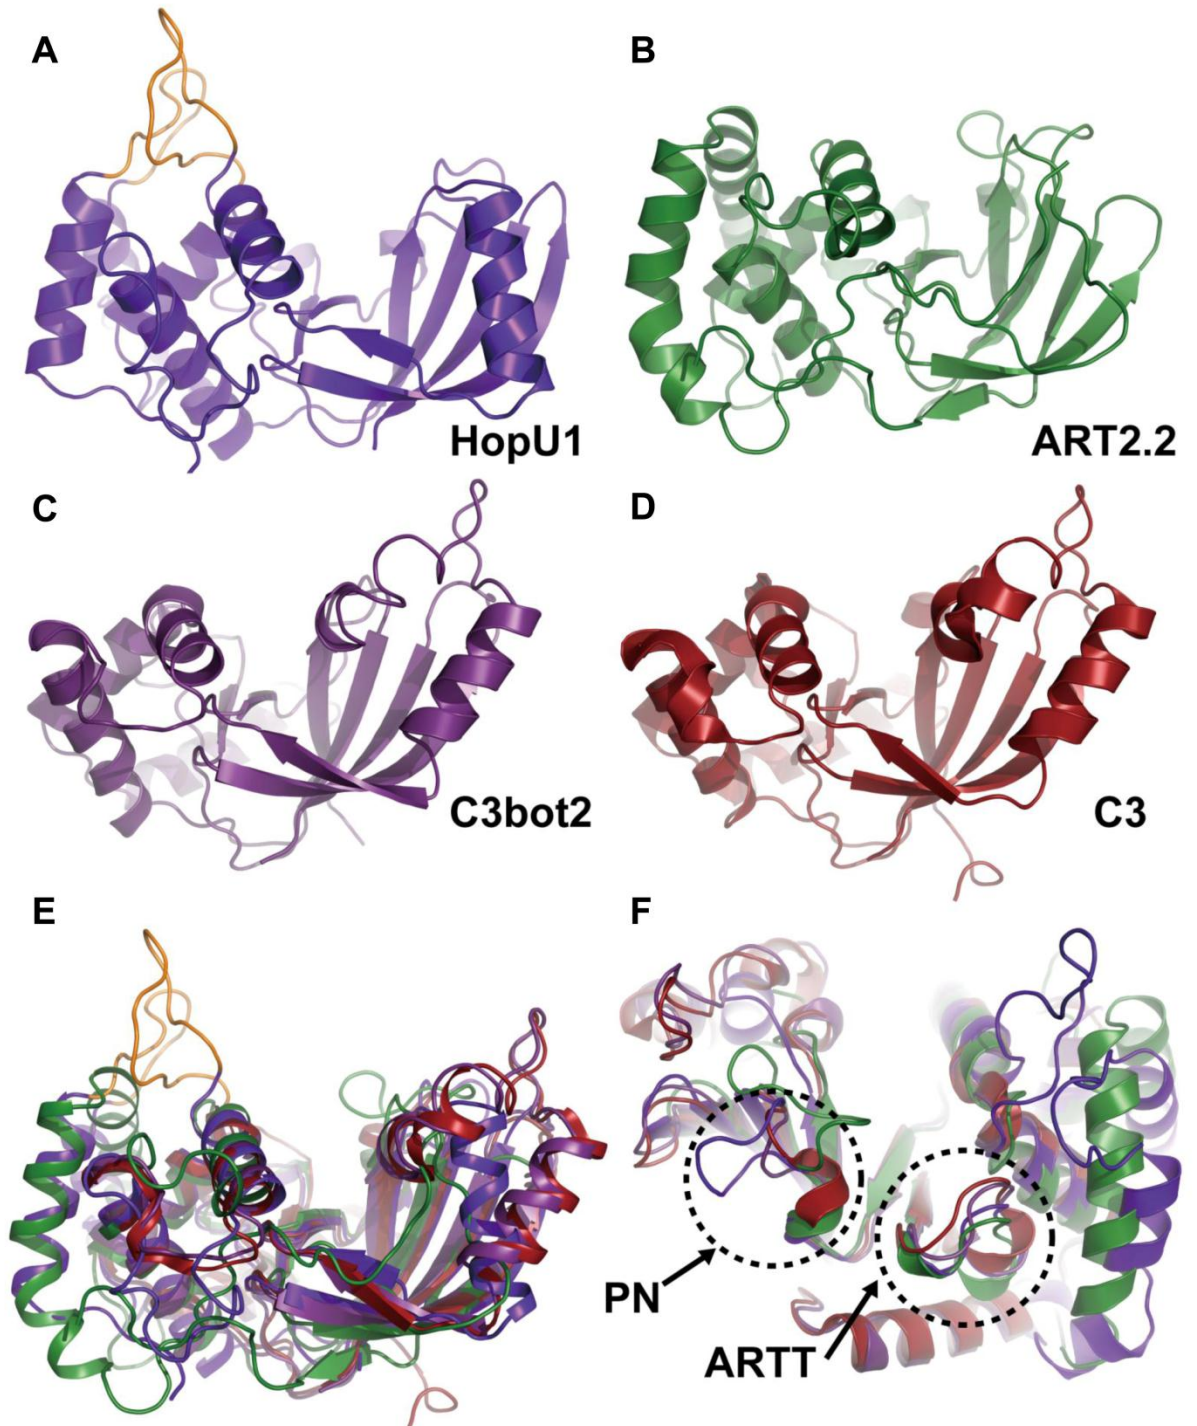

Supplemental Figure 1

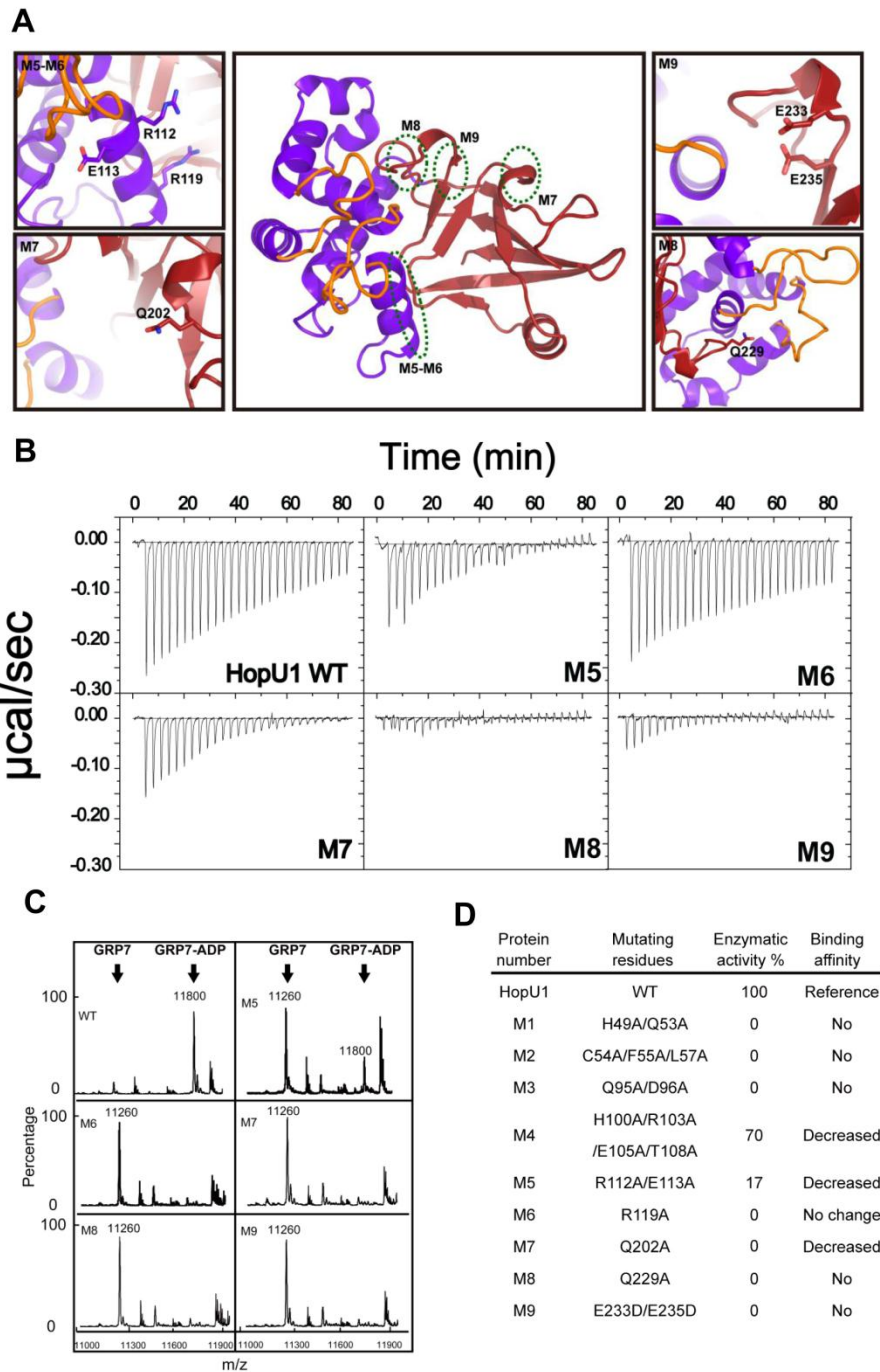

Supplemental Figure 2

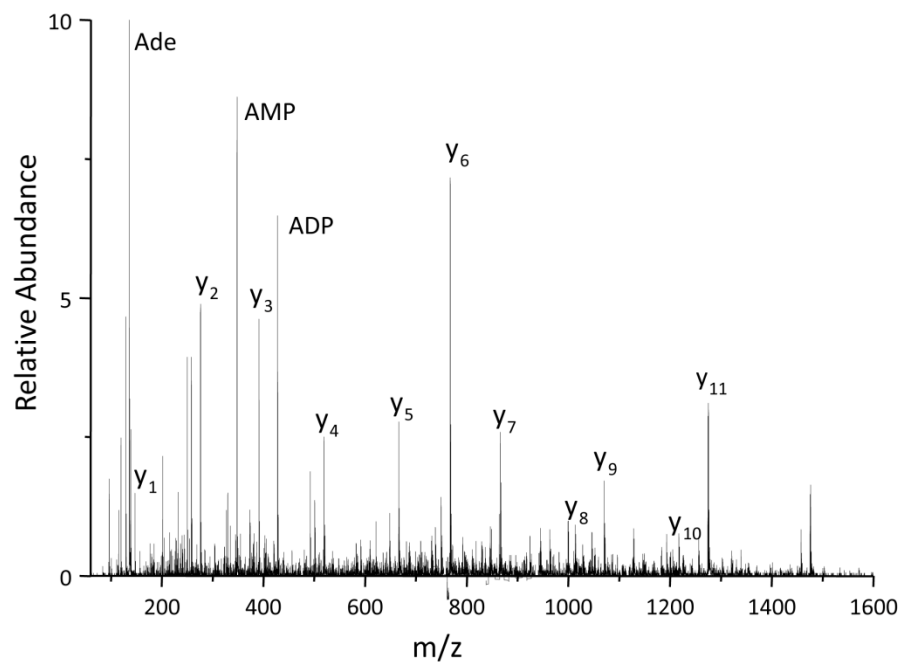

**Supplemental Figure 3**

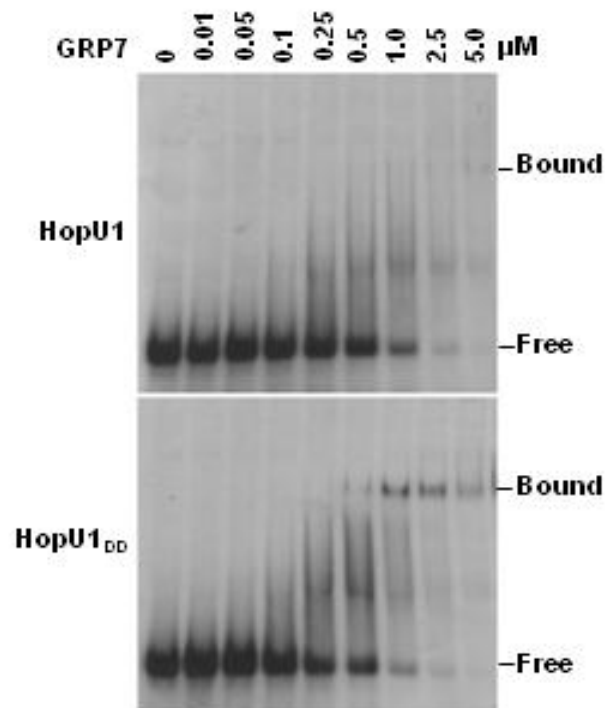

Supplemental Figure 4

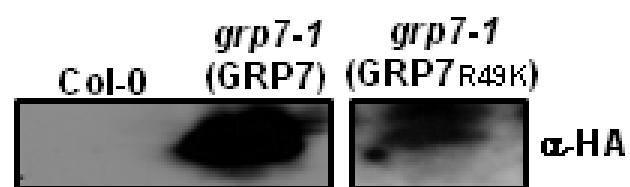

Supplemental Figure 5



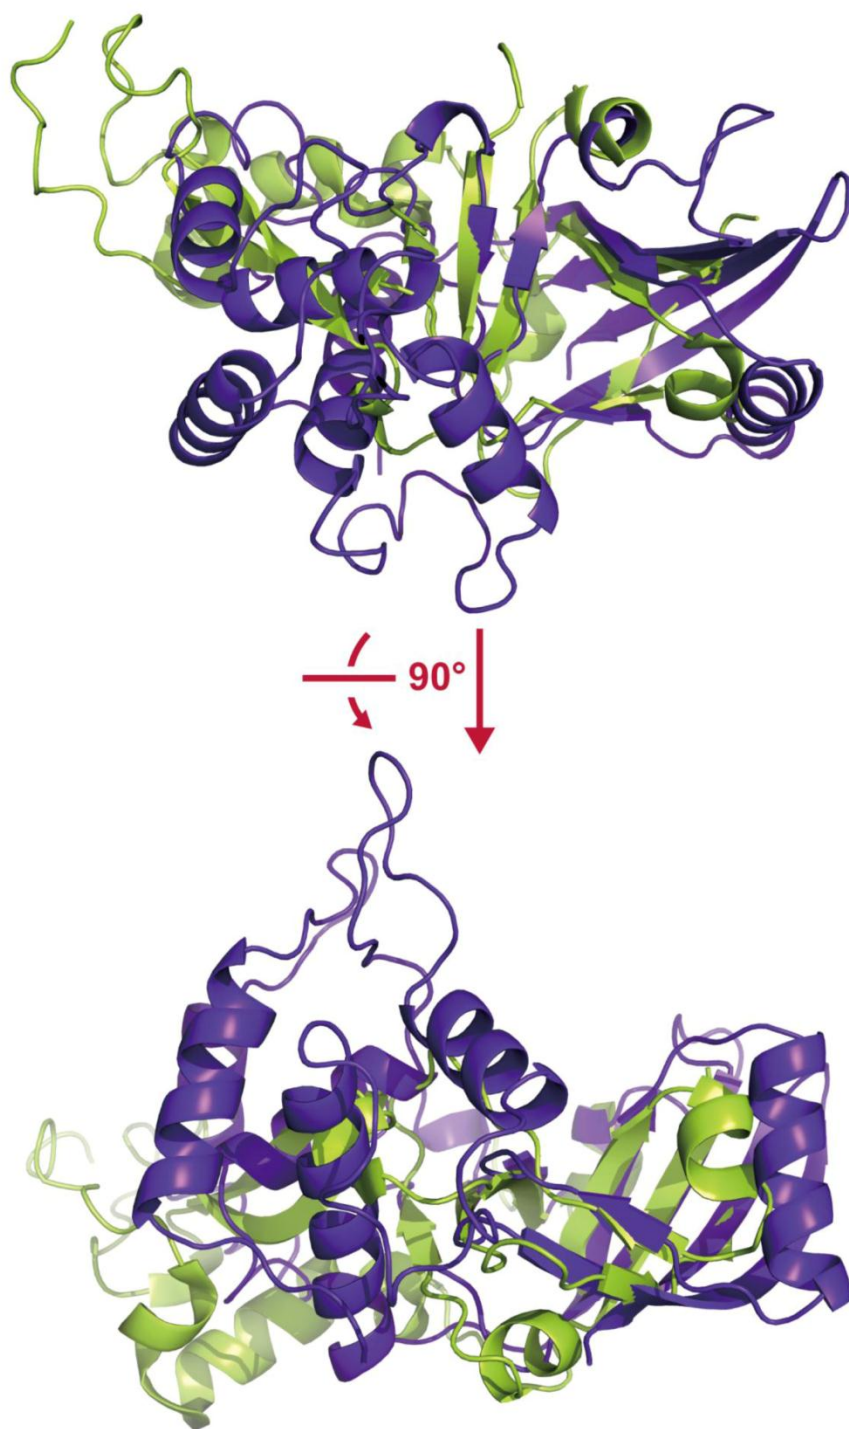

Supplemental Figure 6
